# Supplementary material for: Mycobacterium tuberculosis P-Type ATPases: Possible Targets for Drug or Vaccine Development
Source: Biomed Res Int. 2014 Jul 10;2014:296986. doi: 10.1155/2014/296986 (PMC4119724; doi:10.1155/2014/296986)
Supplement: Supplementary file 1 — Amino acid sequence similarities between the Mycobacterium tuberculosis P-type ATPases. [file 296986.f1.xlsx]

## Sheet: S1
	% Identity
	%	CtpA	CtpB	CtpC	CtpD	CtpE	CtpF	CtpG	CtpH	CtpI	CtpJ	CtpV
	CtpA	100	67.9	38.1	32.2	25.9	38.5	37.9	28.8	38.7	30.9	49.9
	CtpB	67.9	100	36.5	32.8	25.9	40.3	37.3	27.5	37.5	32.7	47.1
	CtpC	38.1	36.5	100	31.8	25.8	41.8	35.7	42	48.6	34.4	37.2
	CtpD	32.2	32.8	31.8	100	26.5	32	36.4	26.1	27.1	55.8	35.4
	CtpE	25.9	25.9	25.8	26.5	100	27.5	26.7	26.7	28.4	24.6	26.5
	CtpF	38.5	40.3	41.8	32	27.5	100	28.7	31.3	33.3	33.8	29.5
	CtpG	37.9	37.3	35.7	36.4	26.7	28.7	100	29.4	44.3	35.3	40.3
	CtpH	28.8	27.5	42	26.1	26.7	31.3	29.4	100	36.5	25.2	28.7
	CtpI	38.7	37.5	48.6	27.1	28.4	33.3	44.3	36.5	100	30.4	29.7
	CtpJ	30.9	32.7	34.4	55.8	24.6	33.8	35.3	25.2	30.4	100	33.7
	CtpV	49.9	47.1	37.2	35.4	26.5	29.5	40.3	28.7	29.7	33.7	100
			20	30	40	50	60	70	100
			% Identity
